# Supplementary material for: Molecular Survey of Toxoplasma gondii in Wild Mammals of Southern Italy
Source: MDPI journal article supplement (doi:10.3390/pathogens12030471), 2023-03-16
Supplement: s1 [file s1]

**Table S1.** Prevalence of *Toxoplasma gondii* DNA in synanthropic wildlife species of southern Italy according to sex, age, and area, 2020-2022. Missing categories (indicated with “-”) refer to the absence of samples.

| Variables   | Species                  |                      |                             |
|-------------|--------------------------|----------------------|-----------------------------|
|             | Porcupine<br>Pos/Tot (%) | Otter<br>Pos/Tot (%) | Stone marten<br>Pos/Tot (%) |
| <b>Sex</b>  |                          |                      |                             |
| Male        | 1/2 (50.0)               | 1/3 (33.3)           | 1/2 (50.0)                  |
| Female      | 1/2 (50.0)               | 1/2 (50.0)           | 0/1 (0)                     |
| <b>Age</b>  |                          |                      |                             |
| Juvenile    | 1/1 (100)                | 1/2 (50.0)           | (-)                         |
| Sub-adult   | (-)                      | (-)                  | (-)                         |
| Adult       | 1/3 (33.3)               | 1/3 (33.3)           | 1/3 (33.3)                  |
| <b>Area</b> |                          |                      |                             |
| Urban       | (-)                      | (-)                  | 1/1 (100)                   |
| Peri-urban  | 1/1 (100)                | 0/1 (0)              | 0/2 (0)                     |
| Rural       | 1/3 (33.3)               | 2/4 (50.0)           | (-)                         |

**Table S2.** Prevalence of *Toxoplasma gondii* DNA in synanthropic wildlife species of southern Italy according to the organs examined, 2020-2022. Missing categories (indicated with “-”) refer to the absence of samples.

| Species             | Organs               |                      |                       |
|---------------------|----------------------|----------------------|-----------------------|
|                     | Heart<br>Pos/Tot (%) | Brain<br>Pos/Tot (%) | Muscle<br>Pos/Tot (%) |
| <b>Porcupine</b>    | 1/2 (50.0)           | 0/2 (0)              | 1/4 (25.0)            |
| <b>Otter</b>        | 1/5 (20.0)           | 1/2 (50.0)           | (-)                   |
| <b>Beech marten</b> | 1/3 (33.3)           | 1/3 (33.3)           | 0/3 (0)               |
